# Supplementary material for: Modeling the hydrology and physiology of Sphagnum moss in anorthern temperate bog
Source: Copernicus journal article supplement (doi:10.5194/bg-2020-90), 2020-05-06
Supplement: Supplementary file 1 [file bg-2020-90-supplement.pdf]

Supplementary Online Material  
for

**Modeling the hydrology and physiology of *Sphagnum* moss in a northern temperate bog**

Xiaoying Shi<sup>1\*</sup>, Daniel M. Ricciuto<sup>1</sup>, Peter E. Thornton<sup>1</sup>, Xiaofeng Xu<sup>2</sup>, Fengming Yuan<sup>1</sup>, Richard J. Norby<sup>1</sup>, Anthony P. Walker<sup>1</sup>, Jeffrey Warren<sup>1</sup>, Jiafu Mao<sup>1</sup>, Paul J. Hanson<sup>1</sup>, Lin Meng<sup>3</sup>, David Weston<sup>1</sup>, Natalie A. Griffiths<sup>1</sup>

<sup>1</sup> Climate Change Science Institute and Environmental Sciences Division, Oak Ridge National Laboratory, Oak Ridge, TN 37831, USA

<sup>2</sup> Biology Department San Diego State University, San Diego, CA, 92182-4614, USA

<sup>3</sup> Department of Geological and Atmospheric Sciences, Iowa State University, Ames, IA, 50011

Corresponding author's email: [shix@ornl.gov](mailto:shix@ornl.gov)

This file contains Figure S1, S2 and S3.

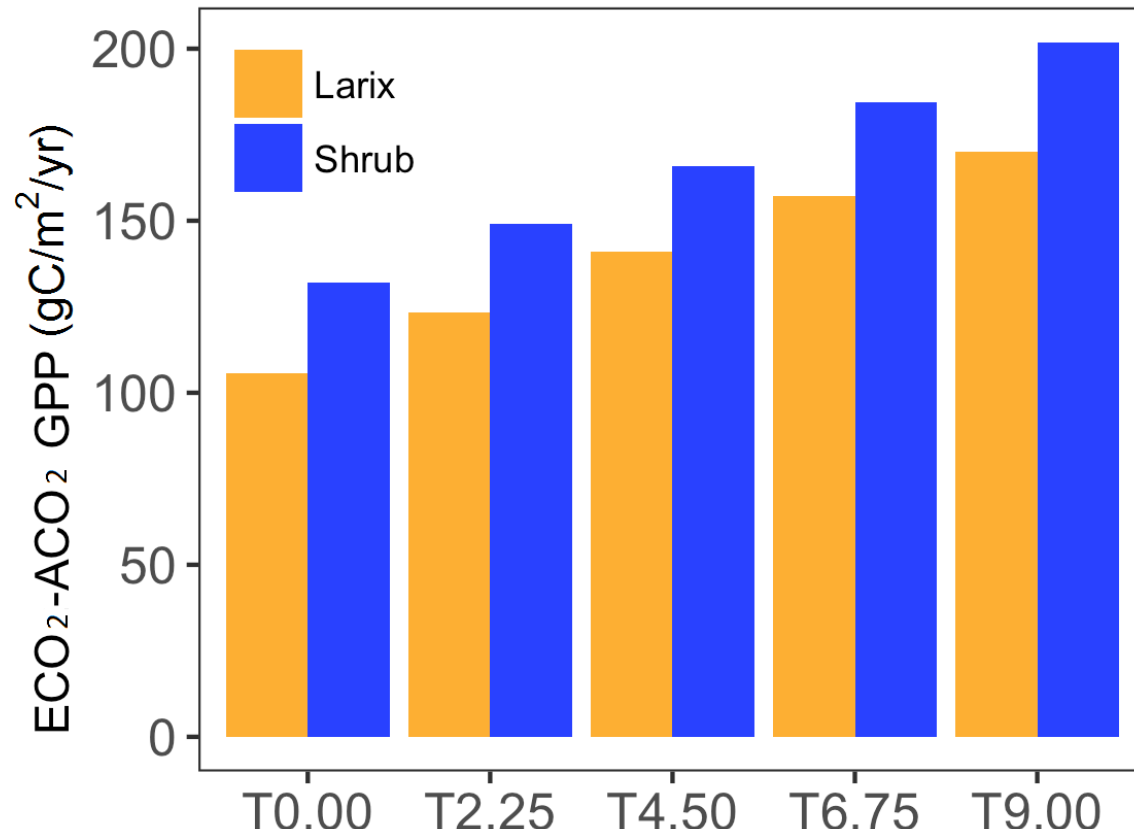

Figure S1. The differences between the elevated and ambient CO<sub>2</sub> with warming conditions (ECO<sub>2</sub>-ACO<sub>2</sub>) for modeled potential GPP for *Larix* and shrub species.

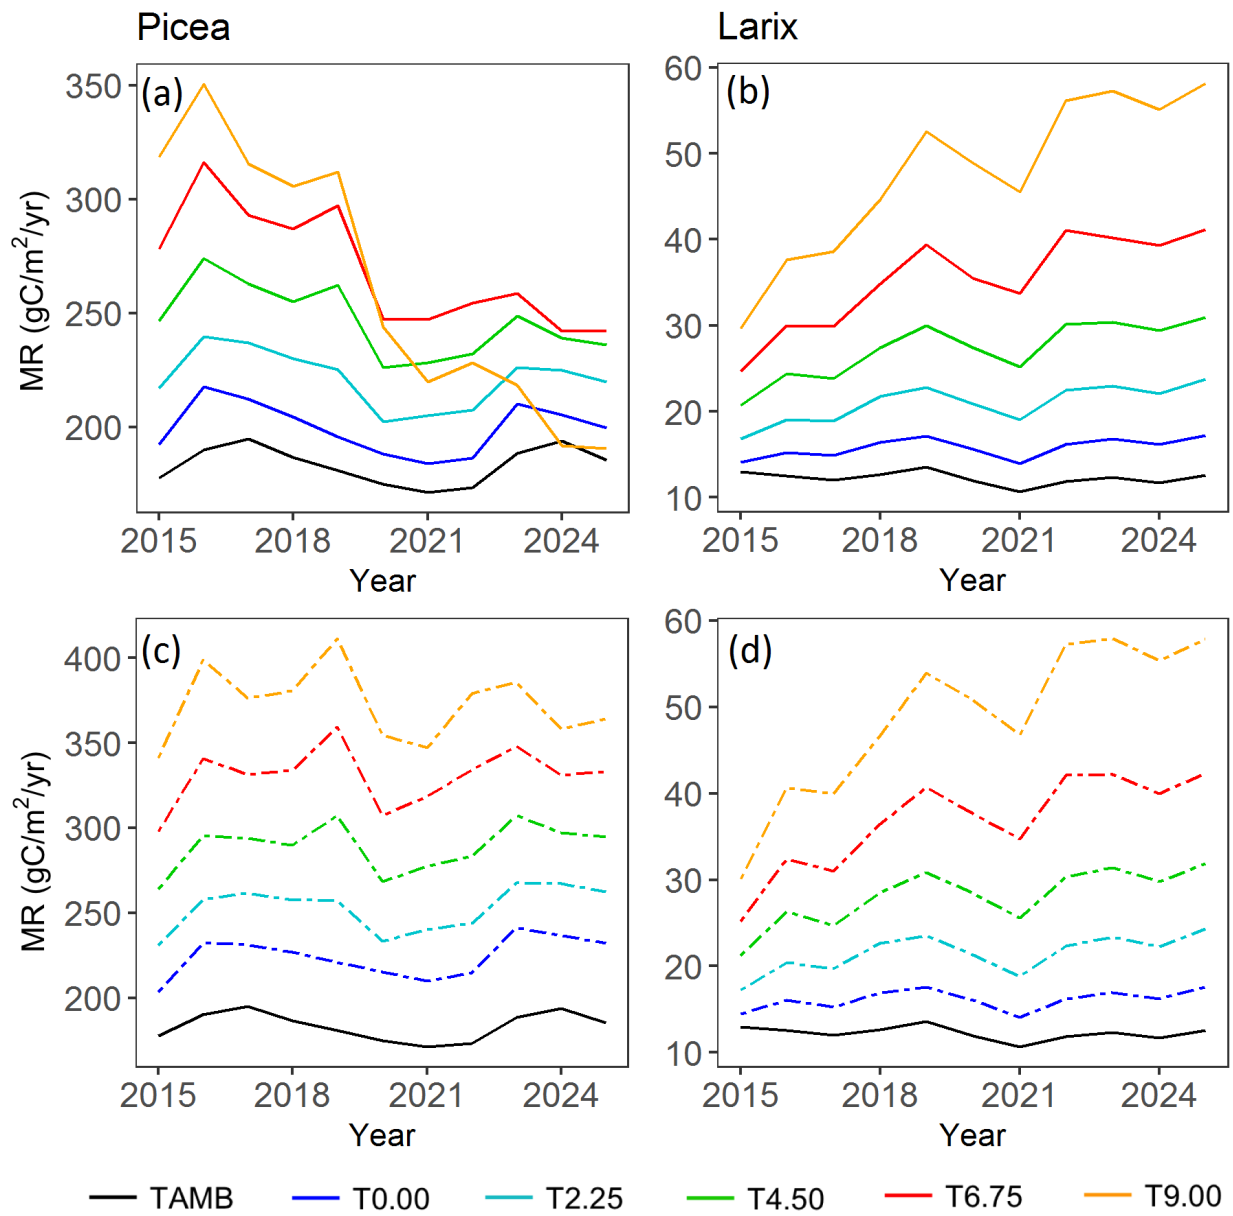

Figure S2 predicted MR response to warming with ambient atmospheric CO<sub>2</sub> (a-b, solid lines) and warming with elevated atmospheric CO<sub>2</sub> concentration (c-d, dash lines), the black solid line TAMB is the ambient temperature and CO<sub>2</sub> case, T0.00 to T9.00 means increasing temperature from 0°C to 9°C.

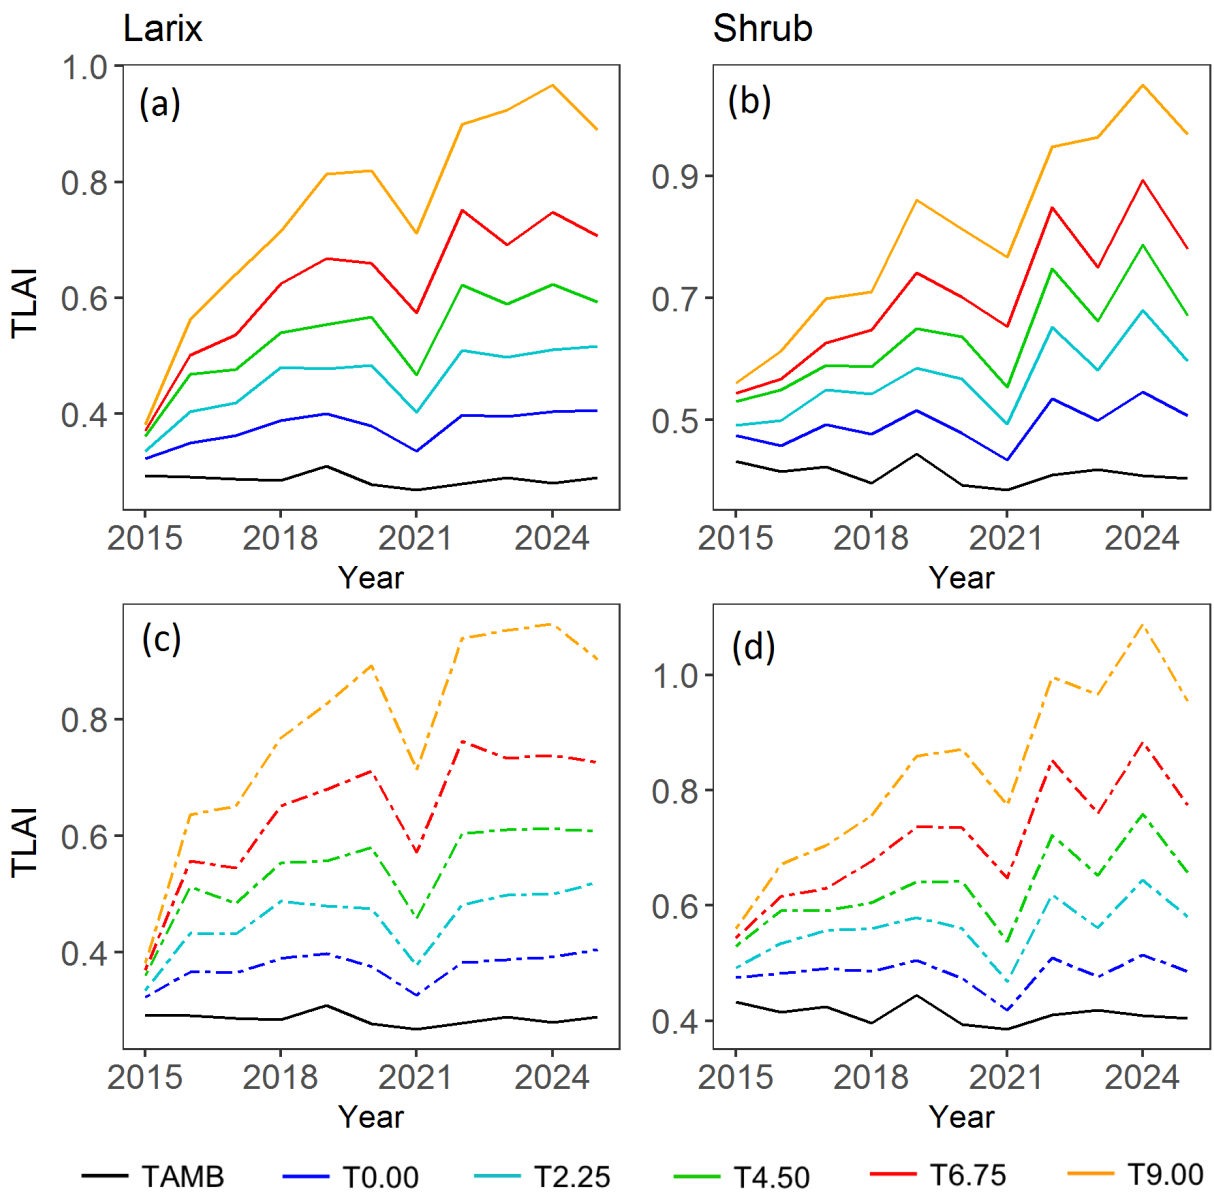

Figure S3 predicted leaf area index response to warming with ambient atmospheric CO<sub>2</sub> (a-b, solid lines) and warming with elevated atmospheric CO<sub>2</sub> concentration (c-d, dash lines), the black solid line TAMB is the ambient temperature and CO<sub>2</sub> case, T0.00 to T9.00 means increasing temperature from 0°C to 9°C.
